# Supplementary material
Source: PubMed Central journal article supplement (PMC10043797)
Supplement: jamainternmed-e227096-s001.pdf [file jamainternmed-e227096-s001.pdf]

## Data Sharing Statement

Potter. Return to Driving After Critical Illness. *JAMA Intern Med.* Published March 27, 2023.  
doi:10.1001/jamainternmed.2022.7096

### Data

**Data available:** No

### Additional Information

**Explanation for why data not available:** Data is not de-identified and is continuing to be used for clinical operations
